1 **Unipolar peptidoglycan synthesis in the Rhizobiales requires an essential class A**  
2 **penicillin-binding protein**

3 Michelle A. Williams<sup>1\*</sup>, Alena Aliashkevich<sup>2</sup>, Elizaveta Krol<sup>3</sup>, Erkin Kuru<sup>4+</sup>, Jacob M.  
4 Bouchier<sup>1</sup>, Jonathan Rittichier<sup>6+</sup>, Yves V. Brun<sup>5</sup>, Michael S. VanNieuwenhze<sup>6</sup>, Anke  
5 Becker<sup>3</sup>, Felipe Cava<sup>2</sup> and Pamela J. B. Brown<sup>1</sup>

6 <sup>1</sup>Division of Biological Sciences, University of Missouri, Columbia, Missouri, United States

7 <sup>2</sup>Department of Molecular Biology, Laboratory for Molecular Infection Medicine Sweden (MIMS), Centre for Microbial  
8 Research, Umeå University, Umeå, Sweden

9 <sup>3</sup>Center for Synthetic Microbiology (SYNMIKRO) and Department of Biology, PhilippsUniversität Marburg, Marburg,  
10 Germany

11 <sup>4</sup>Department of Chemistry, Indiana University, Bloomington, Indiana, United States

12 <sup>5</sup> Département de microbiologie, infectiologie et immunologie, Faculté de médecine, Université de Montréal

13

14 \*Current address: Department of Biology, McMaster University, Hamilton, Ontario, Canada

15 +Current address: Department of Genetics, Harvard Medical School, Boston, Massachusetts, United States

16

17

18 **ABSTRACT**

19 Members of the Rhizobiales are polarly-growing bacteria that lack homologs of the  
20 canonical rod complex. To investigate the mechanisms underlying polar cell wall  
21 synthesis, we systematically probed the function of cell wall synthesis enzymes in the  
22 plant-pathogen *Agrobacterium tumefaciens*. The development of fluorescent D-amino  
23 acid dipeptide (FDAAD) probes, which are incorporated into peptidoglycan by penicillin-  
24 binding proteins in *A. tumefaciens*, enabled us to monitor changes in growth patterns in  
25 the mutants. Use of these fluorescent cell wall probes and peptidoglycan compositional  
26 analysis convincingly demonstrate that a single class A penicillin-binding protein is  
27 essential for polar peptidoglycan synthesis. Furthermore, we find evidence of an  
28 alternative mode of cell wall synthesis that likely requires LD-transpeptidase activity.  
29 Genetic analysis and cell wall targeting antibiotics reveal that the mechanism of unipolar  
30 growth is conserved in *Sinorhizobium* and *Brucella*. This work provides insights into  
31 unipolar peptidoglycan biosynthesis employed by the Rhizobiales during cell elongation.

32

## 33 INTRODUCTION

34 Our current understanding of peptidoglycan (PG) assembly in rod-shaped bacteria  
35 stems largely from investigations conducted using well-known model species like  
36 *Escherichia coli* and *Bacillus subtilis*, which incorporate new cell wall material along the  
37 lateral sidewalls of the cell body. Expanding our studies of cell wall synthesis to include  
38 diverse species, with alternative modes of elongation, is an important step in unveiling  
39 the mechanisms of how and why bacteria evolve novel growth modes and generate  
40 innovative morphologies. It had, for example, long been assumed that all rod-shaped  
41 bacteria employed the same growth strategy; however, unipolar growth is widespread  
42 among rod-shaped bacteria in the Alphaproteobacterial order Rhizobiales, suggesting  
43 diversification of growth strategies [1]. The Rhizobiales are comprised of diverse  
44 bacteria with respect to both their cellular morphology, and their environmental niches  
45 [2, 3]. This includes many species of medical and agricultural significance such as the  
46 facultative intracellular pathogens *Bartonella* and *Brucella*, the nitrogen-fixing plant  
47 symbiont *Sinorhizobium*, and the causative agent of crown gall disease *Agrobacterium*  
48 *tumefaciens*, [4, 5]. PG labeling experiments in *A. tumefaciens*, *Brucella abortus*, and *S.*  
49 *meliloti* have confirmed that unipolar growth is the mode of elongation utilized by these  
50 rod-shaped species [1]. Remarkably, labeling experiments have revealed that polar  
51 growth in *A. tumefaciens* results specifically in the incorporation of pentapeptides at the  
52 growth tip; [6] however, the mechanisms that underlie polar PG biosynthesis remain  
53 poorly understood.

54

55 PG biosynthesis is an essential process that allows bacteria to grow and divide,  
56 faithfully reproducing their characteristic cell shape [7]. PG assembly requires different  
57 classes of synthesis enzymes including the penicillin-binding proteins (PBPs), which  
58 can be further divided into two classes. Class A PBPs are bifunctional enzymes that  
59 catalyze  $\beta$ -1,4 linkages between the N-Acetylglucosamine (NAG) and N-Acetylmuramic  
60 acid (NAM) sugars in a process called transglycosylation, and also synthesize  
61 crosslinks between 4-3 and 4-4 peptides in a process known as transpeptidation [8].  
62 The class B PBPs are monofunctional enzymes that have only transpeptidase (TPase)  
63 activity [9]. The shape, elongation, division, sporulation (SEDS) family proteins, RodA  
64 and FtsW, also possess glycosyltransferase (GTase) activity [10, 11]. Current models of  
65 cell wall assembly maintain that SEDS proteins, in complex with their cognate class B  
66 PBP, are the primary drivers of cell wall synthesis and are required to sustain rod shape  
67 [12-14]. Thus, RodA functions with PBP2 during elongation, while FtsW functions with  
68 PBP3 (encoded by *ftsI*) during cell division. The class A PBPs are currently thought to  
69 act independently from the rod complex, functioning primarily in PG maintenance and  
70 repair [15, 16].

71

72 The suite of cell wall synthesis enzymes encoded by the Rhizobiales, is distinctly  
73 different from other bacterial orders. For example, the elongation-specific rod complex  
74 of proteins including PBP2, RodA, and MreBCD are universally absent [1, 17],  
75 suggesting that RodA-PBP2 are not the primary drivers of elongation. In addition, the  
76 genomes of Rhizobiales are enriched for the presence of LD-transpeptidases (LDTs).  
77 LDTs are a class of cell wall synthesizing enzymes that carry out transpeptidation

78 reactions to catalyze 3-4 and 3-3 crosslinks in the cell wall [18]. The cell wall of *A.*  
79 *tumefaciens* contains a high proportion (30%) of 3-3 and 3-4 crosslinks, in contrast to  
80 laterally growing rod-shaped bacteria, where only 1-5% of the cell wall is crosslinked by  
81 LDTs [19]. This suggests that LDT enzymes may play an important role during polar  
82 growth [1, 20]. Overall, these observations suggest that Rhizobiales use a non-  
83 canonical mechanism for polar elongation.

84

85 Using a combination of microscopy, new probes, biochemical, and genetic analyses we  
86 have characterized the function of the six high molecular weight PBPs encoded by *A.*  
87 *tumefaciens* and have identified the major cell wall synthesis enzymes required for polar  
88 growth. We show that, unlike the proposed auxiliary function of PBP1a in other rod-  
89 shaped bacteria, in *A. tumefaciens* PBP1a is an essential enzyme required for polar PG  
90 expansion, with depletion of PBP1a resulting in a loss of proper rod-shape. Using newly  
91 developed fluorescent D-amino acid dipeptide (FDAAD) probes, we show that PBP1a is  
92 the enzyme primarily responsible for inserting nascent PG at the pole. Additionally,  
93 PBP1a depletion leads to a modified PG composition, including an increase in LDT  
94 linkages. Collectively, this suggests that the mechanism of polar growth in the  
95 Rhizobiales has evolved through the expansion, diversification, and altered regulation of  
96 the core cell wall synthesis machinery. We confirmed the essentiality of PBP1a in the  
97 closely related bacterium *Sinorhizobium*, suggesting that the mechanisms underlying  
98 polar growth in the Rhizobiales are well conserved. Finally, we have identified the  $\beta$ -  
99 lactam faropenem as a specific inhibitor of polar growth in *Agrobacterium*,  
100 *Sinorhizobium*, and *Brucella*, indicating that the target(s) of faropenem are conserved

101 among the Rhizobiales. These findings broaden our understanding of the role of PG  
102 synthesis enzymes that contribute to polar growth and will inform strategies aimed at  
103 developing novel therapeutics that target the cell wall of polar-growing bacteria in the  
104 Rhizobiales [21, 22].

105

## 106 **RESULTS**

### 107 **The class A cell wall synthase PBP1a is essential for polar growth**

108 To begin probing the molecular determinant(s) of polar growth in *A. tumefaciens*, we  
109 sought to generate deletions of the predicted PG synthase enzymes. Although *A.*  
110 *tumefaciens* lacks homologs to the predicted cell elongation synthases RodA and  
111 PBP2, the genome encodes four bifunctional class A PBPs (PBP1a, PBP1b1, PBP1b2  
112 and PBP1c), two monofunctional class B PBPs (PBP3a and PBP3b), and one  
113 monofunctional GTase, MtgA (Figures 1A, 2A). To determine which of these enzyme(s)  
114 provide the primary GTase activity in the absence of a RodA homolog, we made in-  
115 frame deletions of those genes encoding predicted GTase enzymes to further explore  
116 their contribution during cell growth or division.

117

118 Consistent with a previous transposon screen [26] it was not possible to obtain a PBP1a  
119 deletion. We therefore constructed a PBP1a depletion strain by introducing a copy of  
120 the PBP1a-encoding gene, under an IPTG-inducible promoter, at a heterologous site on  
121 the chromosome and subsequently succeeded in creating an in-frame deletion of the  
122 native gene encoding PBP1a in the presence of the IPTG inducer [27]. The PBP1a

123 depletion strain grown in the presence of IPTG is referred to as + PBP1a and the  
124 depletion strain grown in the absence of IPTG is referred to as - PBP1a. We confirmed  
125 depletion of PBP1a in the absence of IPTG using Bocillin-FL, a fluorescent penicillin  
126 derivative. Two bands were observed that could correspond to the predicted molecular  
127 weight of PBP1a (~88 kDa), but only the second band was absent in PBP1a-depleted  
128 cells and likely represents PBP1a protein (Supplementary Figure 1A). Strikingly, cells  
129 depleted of PBP1a for 16 hours lost their rod shape, becoming shorter (Figure 1A, B)  
130 and wider (Supplementary Figure 1B) and had a severe viability defect, as measured by  
131 spotting serial dilutions, compared to the same strain when PBP1a is induced  
132 (Supplementary Figure 1C). The addition of IPTG to wild-type *A. tumefaciens* led to a  
133 slight increase in the median cell length (Figure 1B, 1C) compared to wildtype alone but  
134 had no effect on cell viability or rod shape (Supplementary Figure 1B, 1C).

135

136 Of the remaining bifunctional PBPs, single deletions of the genes encoding PBP1b1,  
137 PBP1b2, and PBP1c had no effect on cell length (Figure 1B, C) or cell viability  
138 (Supplementary Figure 1D). Similarly, a double mutant of PBP1b1 and PBP1b2 or a  
139 triple mutant of PBP1b1, PBP1b2 and PBP1c (referred to as  $\Delta 3\text{pbp}$ ) had no obvious  
140 mutant phenotype with respect to cell length (Figure 1B, C) or cell viability  
141 (Supplementary Figure 1D). Thus, despite all of the predicted bifunctional PBPs being  
142 produced during exponential growth of *A. tumefaciens* (Supplementary Figure 1E), our  
143 data indicate that only PBP1a makes a major contribution to cell growth under standard  
144 laboratory conditions. Similarly, deletion of the monofunctional GTase encoding *mtgA*  
145 produced cells of normal length (Figure 1B, C). The lack of a readily observed

146 phenotype in the  $\Delta mtgA$  strain is consistent with findings in *E. coli* and *Hyphomonas*  
147 *neptunium* [28-30]. Together, these data suggest that the bifunctional enzyme PBP1a,  
148 which likely has both GTase and TPase activities, fulfils the role of RodA and PBP2, as  
149 the primary PG synthase required for polar elongation in *A. tumefaciens*.

150



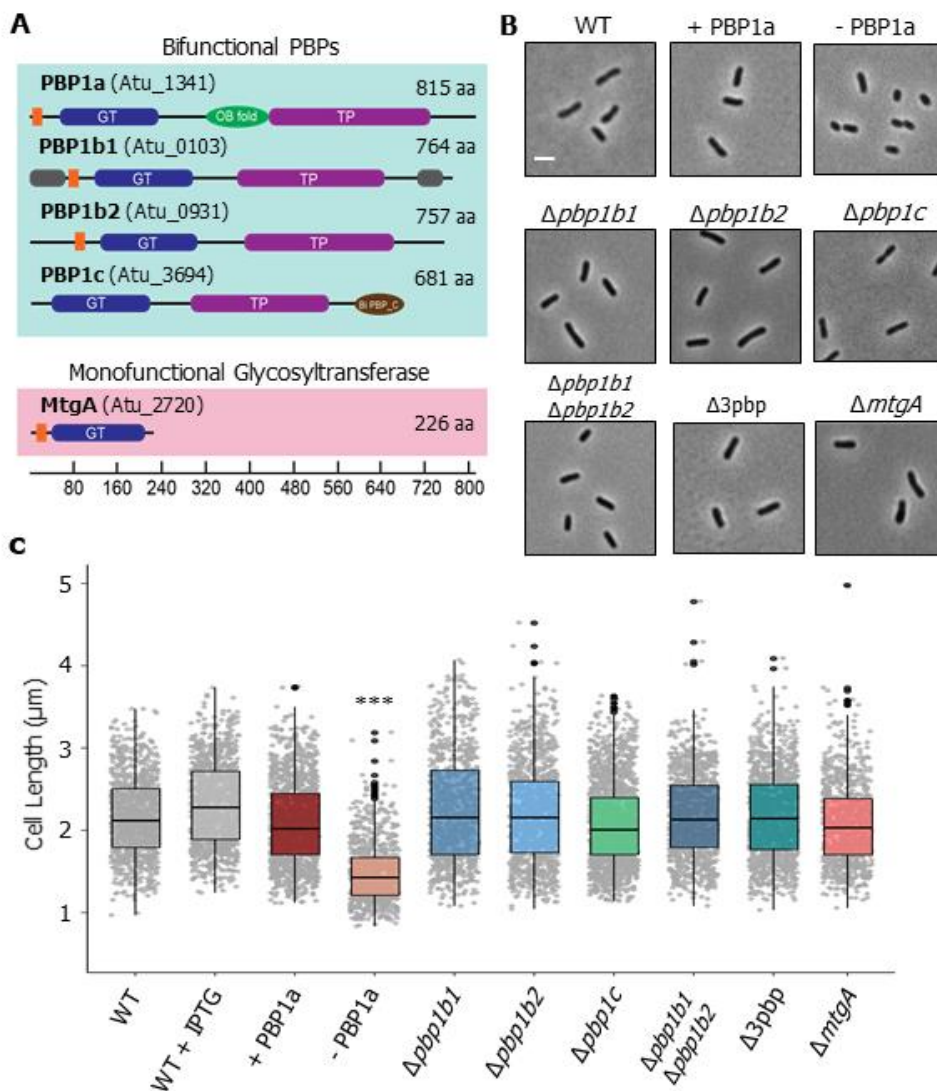

151

152 **Figure 1. Functional characterization of PG synthases in *A. tumefaciens*.** (A) Domain structure of the  
 153 putative PG biosynthesis enzymes showing the transmembrane (orange), glycosyltransferase (GT,  
 154 PF00912), transpeptidase (TP, PF00905), OB-like (PF17092), and biPBP\_C (PF06832) domains. The  
 155 regions of intrinsic disorder (grey) as predicted by MoBiDB are also shown [23]. The scale indicates the  
 156 length in amino acids (aa). The corresponding ATU numbers are listed in parentheses beside each gene  
 157 name. (B) Phase microscopy images showing the phenotypes of PG synthase mutants. Each strain was  
 158 grown to exponential phase, spotted on an ATGN agar pad (ATGN is a minimal medium with glucose and  
 159 (NH<sub>4</sub>)<sub>2</sub>SO<sub>4</sub>), and imaged by phase microscopy. Scale bar: 2  $\mu\text{m}$ . (C) Cell length distributions of PG  
 160 synthase mutants. The indicated strains were grown as in B and subjected to cell lengths measurements  
 161 using MicrobeJ [24]. The data are represented as box and whisker plots in the style of Tukey [25], and  
 162 visualizes five summary statistics (the center line is the median, the two hinges correspond to the first  
 163 and third quartiles (the 25<sup>th</sup> and 75<sup>th</sup> percentiles), the two whiskers (representing the smallest and  
 164 largest values no further than 1.5 times the interquartile range), and all "outlying" points are plotted  
 165 individually. The PBP1a depletion strain grown in the presence of IPTG is referred to as + PBP1a and the  
 166 depletion strain grown in the absence of IPTG is referred to as - PBP1a. Distributions of cells significantly  
 167 different from wildtype (WT) are indicated (\*\*\*; One-Way ANOVA with Bonferroni correction,  $p > 2 \times 10^{-16}$ ).  
 168  $n = > 800$  cells per strain.

169 **Class B synthases PBP3a and PBP3b are required for cell division**

170 Incorporation of PG at the septum prior to cell division typically requires synthesis  
171 enzymes that are distinct from the cell elongation machinery. Although *A. tumefaciens*  
172 lacks the cognate SEDS-PBP pair that is typically required for elongation, the SEDS  
173 protein FtsW and PBP3, which are required for cell division, are conserved. While most  
174 bacteria possess a single, essential *ftsI* gene that encodes PBP3, some Rhizobiales,  
175 including *A. tumefaciens*, encode two FtsI homologs (PBP3a and PBP3b) (Figure 2A).  
176 *pbp3a* resides in the *mra* operon of cell division and cell envelope biogenesis genes  
177 similar to most *ftsI*-encoding homologs [31], while PBP3b is encoded as a monocistronic  
178 gene elsewhere in the genome. This raises the possibility that the second  
179 monofunctional transpeptidase (PBP3b) may serve the role of a PBP2 homolog that  
180 functions in polar elongation. Thus, we sought to determine if either of the two class B  
181 PBP homologs were required for cell division or polar elongation in *A. tumefaciens*.  
182 Saturating transposon mutagenesis in LB medium indicated that PBP3a was likely  
183 essential [26]; however, it was possible to make a deletion of *pbp3a* when cells were  
184 grown in minimal medium. These observations suggest that the PBP3a-encoding gene  
185 was conditionally essential.

186

187 In minimal medium, deletion of *pbp3a* caused a severe cell viability defect  
188 (Supplementary Figure 1F). In addition, cells were longer (Figure 2B, C), and were  
189 frequently observed to adopt branching or bulging morphologies; these features are a  
190 hallmark of cell division defects in *A. tumefaciens* [32, 33]. In contrast, deleting *pbp3b*  
191 had no effect on cell viability (Supplementary Figure 1F) or cell length (Figure 2B, C).

192 Together, these results indicate that PBP3a is the major class B PBP contributing to cell  
193 division in *A. tumefaciens*. Since the deletion of the gene encoding PBP3a did not fully  
194 inhibit cell division, we hypothesized that PBP3b may be able to partially compensate  
195 for the loss of PBP3a. To address this possibility, we first created a PBP3a depletion  
196 strain; when this strain was grown in the absence of IPTG for 24 hours, it phenocopied  
197 the cell viability and cell length defects of the *pbp3a* deletion mutant (Figure 2B, C). We  
198 then depleted PBP3a in a  $\Delta pbp3b$  mutant background, and found that cells not only  
199 failed to divide, but also swelled at the mid-cell before lysing (Figure 2C, Supplemental  
200 movie 1), indicating that PBP3a and PBP3b both contribute to septal PG biosynthesis  
201 during cell division. The phenotype observed in the absence of both PBP3a and PBP3b  
202 was remarkably similar to the phenotype observed during depletion of FtsW in *A.*  
203 *tumefaciens* [32]. FtsW possesses GTase activity, and is a major synthase required for  
204 cell division [12, 34]. Consistent with current models of cell division, we hypothesize that  
205 FtsW provides the GTase activity while PBP3a and PBP3b provide the DD-  
206 transpeptidase (TPase) activity necessary for proper septal PG biosynthesis during cell  
207 division in *A. tumefaciens*. In all, our findings support a model in which PBP3a can  
208 sustain proper cell division in the absence of PBP3b, and that, while PBP3b contributes  
209 to septal PG synthesis, it cannot fully compensate for the loss of PBP3a. Thus, both  
210 class B PBPs contribute primarily to septal PG biosynthesis.

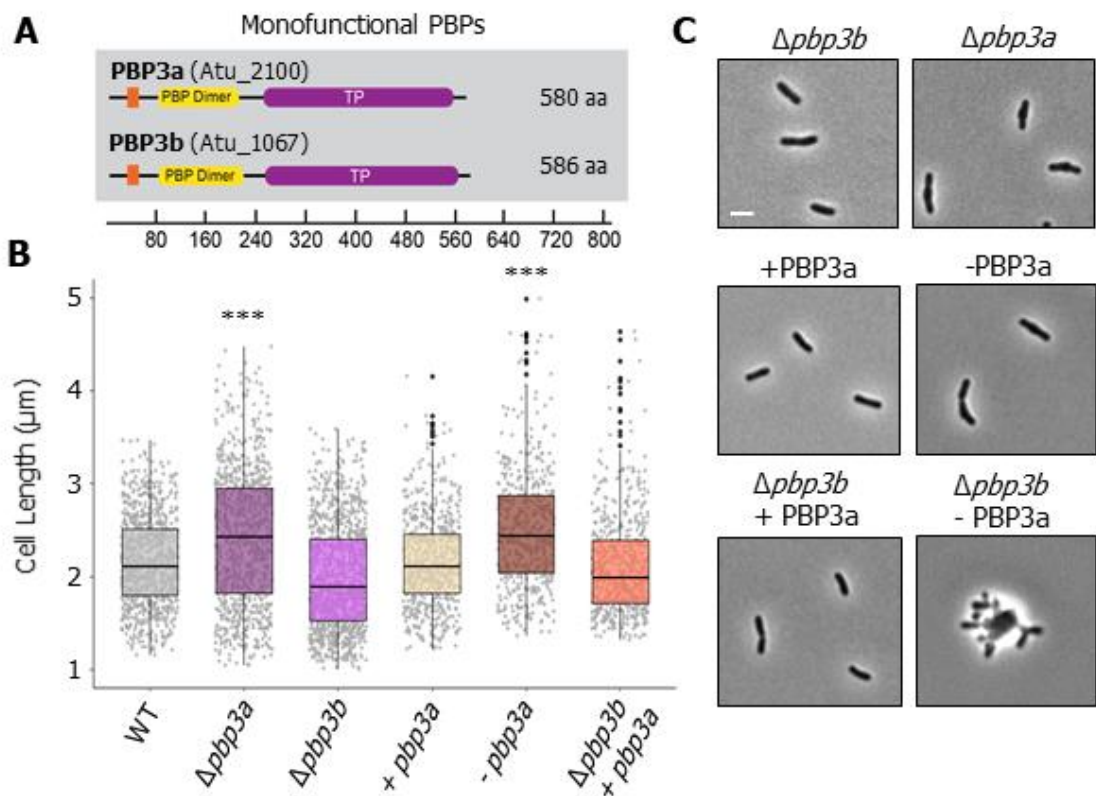

211

212 **Figure 2. Functional characterization of monofunctional synthases PBP3a and PBP3b.** (A) Domain  
 213 structure of the putative PG biosynthesis enzymes showing the transmembrane (orange), transpeptidase  
 214 (TP, PF00905), and PBP dimer (PF03717) domain. The scale indicates the length in amino acids (aa).  
 215 The corresponding ATU numbers are listed in parentheses beside each gene name. (B) Phase  
 216 microscopy images showing the phenotypes of PG synthase mutants. Each strain was grown to  
 217 exponential phase, spotted on an ATGN agar pad, and imaged by phase microscopy. Scale bar: 2  $\mu\text{m}$ .  
 218 (C) Cell length distributions of PG synthase mutants. The indicated strains were grown to exponential  
 219 phase, spotted on an agar pad, imaged by phase microscopy, and subjected to cell lengths  
 220 measurements using MicrobeJ [24]. The data are shown as box and whisker plots in the style of Tukey  
 221 [25]. Distributions of cells significantly different from wildtype (WT) are indicated (\*\*\*, One-Way ANOVA  
 222 with Bonferroni correction,  $p < 2 \times 10^{-16}$ ).  $n = > 500$  per strain.

223

## 224 **Development of new fluorescent cell wall probes to monitor PBP activity**

225 Traditional fluorescent D-amino acid (FDAA) probes are an exceptionally useful tool for  
226 investigating the patterning of cell wall synthesis in diverse microbes [35]. However,  
227 FDAAs report on the activity of extracellular/periplasmic DD and LD transpeptidases, and  
228 as a result can be incorporated into the PG in a growth-independent mechanism [6].  
229 Here, we have developed fluorescent D-amino acid dipeptide (FDAADs) probes to  
230 observe nascent sites of PG crosslinking in living cells, thus eliminating the need for  
231 click chemistry that is required when using traditional D-amino acid dipeptide probes  
232 (DAADs) [6, 36]. DAADs are incorporated into the cell wall precursors by the  
233 cytoplasmic MurF ligase and probe incorporation reports specifically on nascent PG  
234 synthesis [36-38]. The resulting lipid II-linked modified precursor is most likely covalently  
235 crosslinked to an existing glycan strand through the activity of bifunctional PBPs (Figure  
236 3A). The FDAAD probe HADA—DA successfully labeled the PG of several bacteria,  
237 including *B. subtilis*, *E. coli*, *Streptomyces venezuelae* and *A. tumefaciens* (Figure 3B,  
238 C), and we demonstrated and evaluated PG labeling with four additional FDAADs of  
239 different sizes and molecular weights in diverse species (Supplemental figure 2A-D). In  
240 addition, *S. venezuelae*, a polar growing Actinobacteria, was short pulsed with three  
241 different FDAADs to illustrate that these probes report on the newest PG synthesis  
242 activity (Figure 3B), similar to FDAAs [39, 40]. Given their cytoplasmic mechanism of  
243 incorporation, complementary to FDAAs (which are incorporated by transpeptidases  
244 periplasmically) [6], these probes will be particularly useful to distinguish between  
245 growth-dependent and growth-independent PG crosslinking in species with a higher  
246 proportion of extracellular LDT activity, such as polar-growing bacterial species.

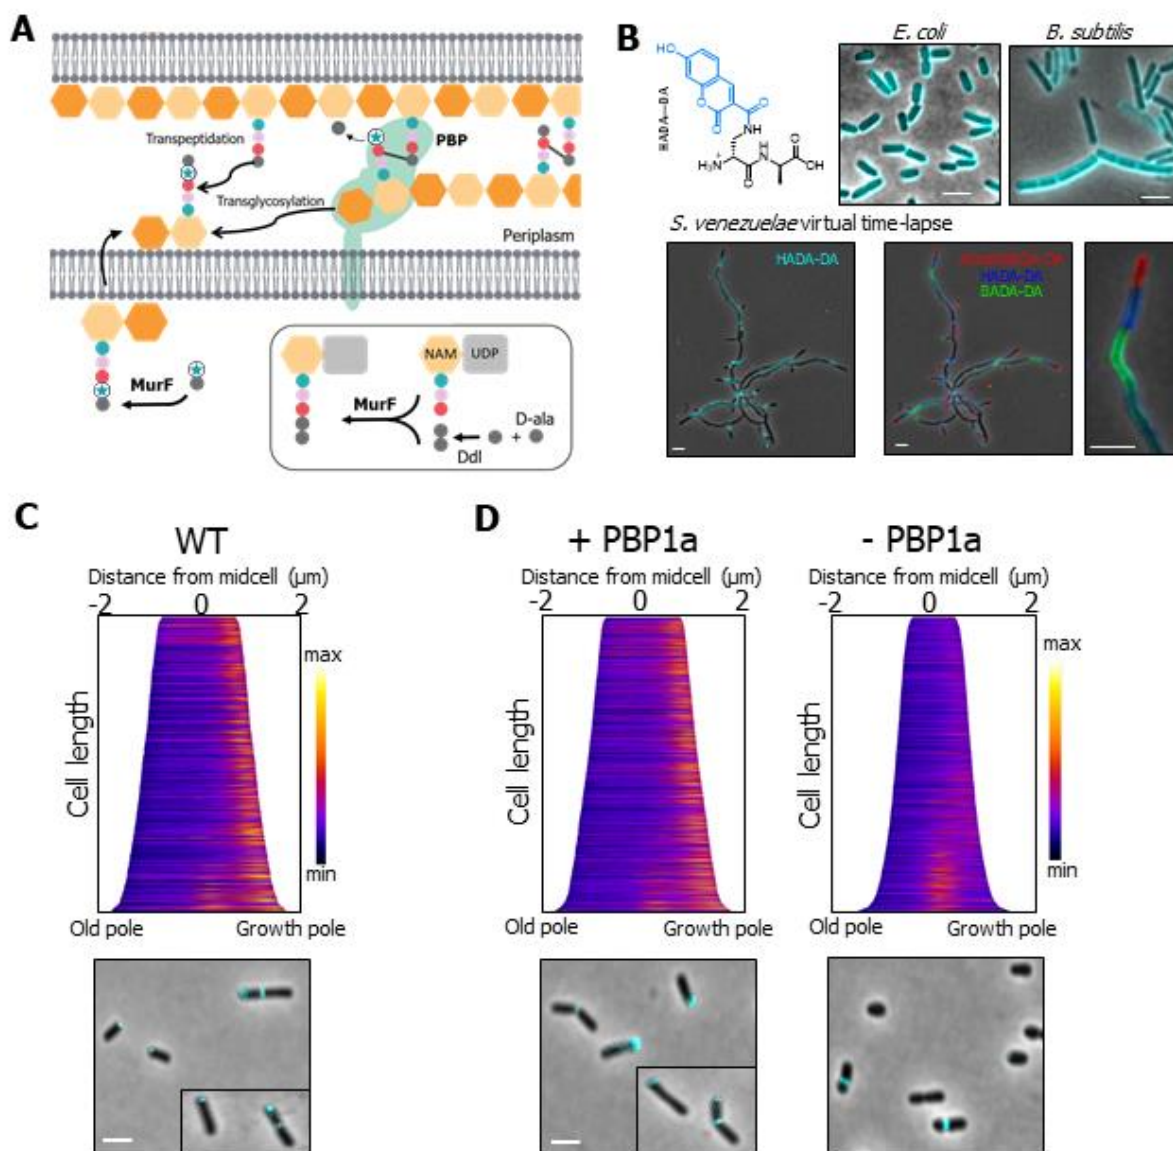

247

248 **Figure 3. Fluorescent D-amino acid dipeptide (FDAAD) labeling is absent from the growth pole in**  
 249 **the PBP1 depletion.** (A) Schematic of the incorporation pathway of fluorescent D-amino acid dipeptides  
 250 (FDAADs), which are incorporated into the mucopeptide precursor molecule in the cytoplasm by MurF  
 251 ligase. The modified mucopeptide precursor is flipped across the membrane and the activity of a  
 252 bifunctional PBP crosslinks the new PG monomer into the existing PG sacculus. (B) Top row: structure of  
 253 the FDAAD HADA—DA and merged phase and fluorescent channels of labeling patterns of HADA—DA  
 254 in *E. coli* and *B. subtilis*. Bottom row: short pulse labeling of *S. venezuelae* sequentially labeled first with  
 255 BADA—DA, followed by HADA—DA and Atto610DA—DA. (C) Demographs of wild-type (WT) cells depict  
 256 incorporation of FDAADs at a population level. Median profiles of the fluorescence channel are stacked  
 257 and ordered by cell length  $n = 513$ . (D) Demographs depict incorporation of FDAAD in the PBP1a  
 258 depletion strain grown in the presence or absence of IPTG labeled + PBP1a and - PBP1a, respectively.  
 259 Merged phase and fluorescent channels of cells with representative polar and septum labeling of FDAAD  
 260 are shown to the right of each demograph. Scale bars: 2  $\mu\text{m}$ .  $n = > 1000$  per strain

261

262 **PBP1a is the major synthase incorporating PG at the pole**

263 *A. tumefaciens* was labeled for ~5% of the cell cycle with HADA—DA. As expected,  
264 cells exhibit labeling at the growth pole during elongation, and at the septum in cells  
265 undergoing cell division (Figure 3C). This pole-to-septum labeling pattern is consistent  
266 with other cell wall labeling methods including fluorescent D-amino acids (FDAAs) [41]  
267 and D-cysteine labeling [1]. Similar to wild-type cells, a pole-to-septum labeling pattern  
268 was observed in the  $\Delta 3pbp$  mutant, consistent with a limited role for these class A PBPs  
269 in polar growth under the conditions tested (Supplementary Figure 3).

270

271 In stark contrast to wild-type (Figure 3C) or PBP1a replete cells (Figure 3D), pole-  
272 specific labeling with HADA—DA was almost completely absent from cells depleted of  
273 PBP1a for 20 hours (Figure 3D). Similar results were observed with NADA—DA and  
274 BADA—DA (Supplemental Figure 4A, B). Consistent with these observations, we  
275 tracked the growth of PBP1a-depleted cells for seven generations using a microfluidic  
276 device and found that the reduction in cell length occurred first for the new pole  
277 daughter cell and likely resulted from the loss of polar PG insertion by PBP1a  
278 (Supplemental Figure 3A, Supplemental movie 2). We thus concluded that PBP1a is the  
279 major PG synthase required for polar PG incorporation. Notably, PBP1a-depleted cells  
280 have more robust FDAAD labeling at the septum (Figure 3D), suggesting that additional  
281 glycosyltransferase enzymes remain active at the site of cell division.

282

283 **LD-transpeptidases contribute to growth-independent and growth-dependent PG**  
284 **modification**

285 In contrast to FDAAD incorporation, which is linked to the PG precursors in the  
286 cytoplasm, the more conventional fluorescent D-amino acid (FDAA) labeling occurs in  
287 the periplasm through either DD-transpeptidase reactions carried out by PBPs or LD-  
288 transpeptidase reactions carried out by LDTs [41, 42]. As expected, wild-type and  
289  $\Delta 3\text{pbp}$  cells labeled with a short pulse of the FDAA probe HADA show the characteristic  
290 pole-to-septum labeling pattern that is typical of *A. tumefaciens* growth (Figure 4A,  
291 Supplementary Figure 3). Notably, FDAADs label discrete regions at the pole and  
292 midcell, while FDAA labeling is more prominent in the sidewalls, particularly of the new  
293 pole compartment prior to cell division, while the old pole remains unlabeled. (Figure 4A  
294 white arrow). This labeling pattern is consistent with the reported growth-independent  
295 incorporation of FDAAs by LDTs [6]. Interestingly, we observed that a majority of  
296 growth-independent labeling occurred preferentially in the new pole compartment. To  
297 further support this idea, we labeled *A. tumefaciens* for 60 minutes with either HADA or  
298 HADA—DA and compared the labelling patterns (Supplemental figure 5). After a 60-  
299 minute incubation, HADA—DA labeling was primarily found in distinct regions at the  
300 pole and midcell, with little sidewall labeling, similar to a short pulse and consistent with  
301 areas of new synthesis. In contrast, the HADA labelling was much brighter, and fully  
302 labeled the sidewalls. HADA labeling was particularly enriched along the sidewalls of  
303 the new-pole compartment. Our observations during short and long-pulse labeling  
304 experiments suggests that, in addition to growth-dependent pole and midcell labeling,



305 LDTs contribute to spatially distinct crosslinking of the cell wall, particularly along the  
306 sidewalls of the new pole daughter cell.

307

308 We next sought to test whether FDAA labeling at the growth pole was absent in the  
309 PBP1a depletion strain. In contrast to the absence of polar incorporation that was seen  
310 following FDAAD labeling, cells depleted of PBP1a labeled robustly at the growth pole  
311 with HADA (Figure 4A). Since PBP-mediated incorporation of FDAADs is absent from  
312 the growth pole in the PBP1a depletion (Figure 3D, Supplemental Figure 4A, B), the  
313 major enzymes incorporating HADA at the pole are most likely LDTs, consistent with  
314 recent findings for incorporation of FDAAs in *E. coli* [42]. Additionally, the activity of  
315 LDTs has been shown to be functionally linked to the activity of class A PBPs [42, 43].  
316 Therefore, our findings indicate that LD-transpeptidation contributes to PG crosslinking  
317 at the growth pole.

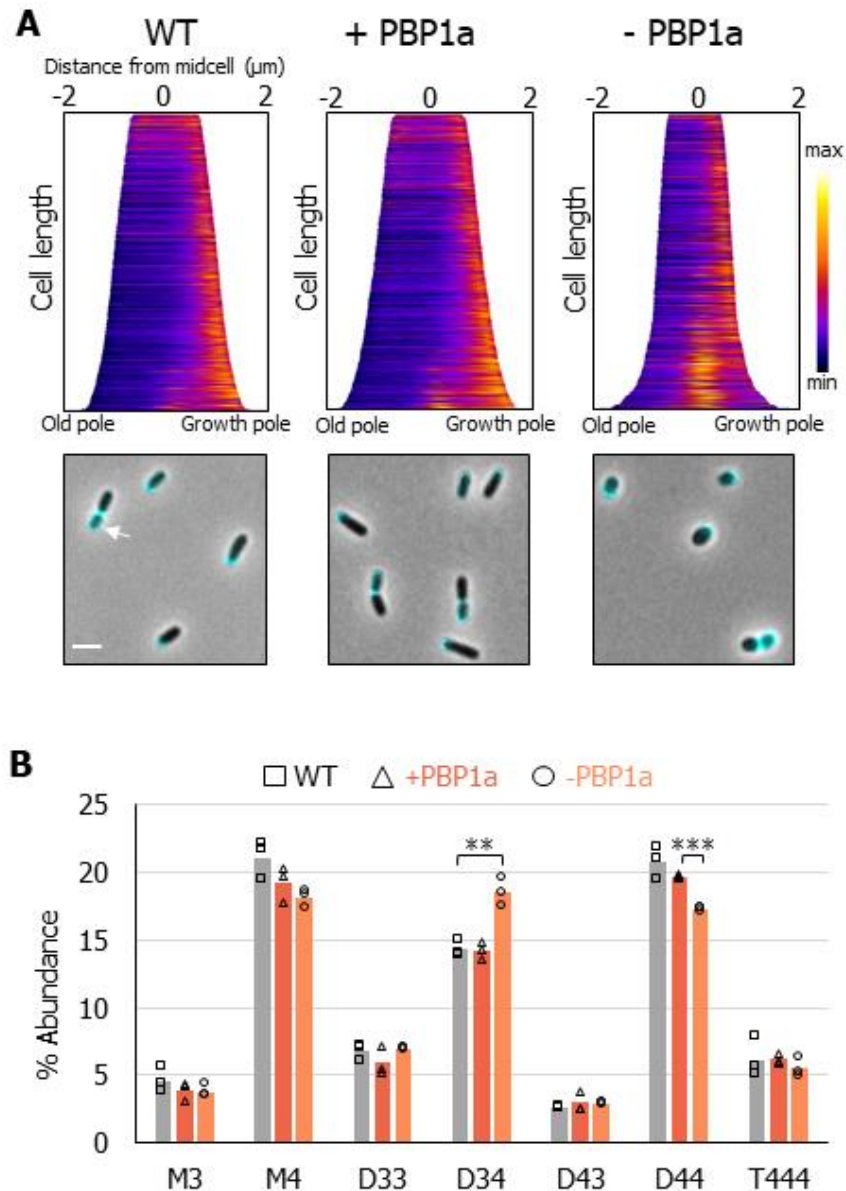

318

319 **Figure 4. Fluorescent D-amino acid (FDAA) and PG composition analysis illustrates a role for**  
 320 **LDTs in polar growth.** (A) Demographs of wildtype (WT) and the PBP1a depletion strain grown in the  
 321 presence or absence of IPTG labeled + PBP1a and - PBP1a, respectively. Demographs depict  
 322 incorporation of FDAA at a population level. Median profiles of the fluorescence channel are stacked and  
 323 ordered by cell length wildtype  $n = > 600$  per strain. Merged phase and fluorescent channels of cells with  
 324 representative polar and septum labeling by FDAAs are shown below each demograph. Scale bar: 2  $\mu\text{m}$ .  
 325 (B) Bar graphs depicting the average abundance of mucopeptides obtained by UPLC analysis from  
 326 wildtype, and the PBP1a depletion strain grown in the presence or absence of IPTG for 16 hours. Major  
 327 mucopeptides are labeled M, monomers; D, dimers; and T, trimers. Numbers indicate the length of the  
 328 mucopeptide stems and the position of cross-links in dimers and trimers. Data shown are averages taken  
 329 from analysis of three independent biological samples. Samples that are statistically significant are  
 330 indicated (One-Way ANOVA with Tukey's multiple comparison test, \*\*  $p < 0.005$ , \*\*\*  $p < 0.0005$ ). p-value  
 331 between + PBP1a and - PBP1a for D34 was 0.0588 and between WT and - PBP1a for D44 was 0.072.

332

333 **Depletion of PBP1a or loss of PBP1b2 leads to increased levels of LD-crosslinks**  
334 **in PG**

335 Since depletion of PBP1a led to dramatic reduction in the polar incorporation of  
336 FDAADs, while maintaining polar FDAA incorporation we hypothesized that a decrease  
337 in the activity of PBPs relative to LDTs may lead to altered PG composition. We grew  
338 the PBP1a depletion strain in the presence or absence of IPTG for 16 hours, collected  
339 the cell wall fraction, and analyzed muropeptides by ultra-performance liquid  
340 chromatography (UPLC). The major muropeptides found in wild-type *A. tumefaciens*  
341 PG, included monomeric (M), dimeric (D) and trimeric (T) muropeptides (Figure 4B).  
342 PG from PBP1a-depleted cells had significantly reduced levels of muropeptides with DD-  
343 crosslinks, as seen by the ~3% reduction in D44 abundance (Figure 4B). As expected,  
344 this observation confirmed that depleting PBP1a leads to decreased DD-transpeptidase  
345 activity. Depletion of PBP1a also resulted in an increase in muropeptides containing LD-  
346 crosslinks, as indicated by the ~4% increase in D34 abundance (Figure 4B). A similar  
347 decrease in D44 abundance and increase in D34 abundance was also observed in the  
348  $\Delta pbp1b2$  (Supplemental Figure 4A), but not in the single deletions of *pbp1b1*, *pbp1c*,  
349 *pbp3a* or *pbp3b* (Supplemental Figure 4B). Therefore, the compositional changes in the  
350 double and triple mutant strain could likely be attributed to the deletion of *pbp1b2*.  
351 These results implicate PBP1b2 as an important DD-transpeptidase enzyme in *A.*  
352 *tumefaciens* and suggest that increased LDT activity may be a general response to  
353 decreased DD-transpeptidase levels, and not necessarily a specific response to  
354 depletion of PBP1a. Furthermore, since we saw an increase in muropeptide D34 but not  
355 D33 (Figure 4B), we hypothesize that decreased DD-transpeptidase levels activate only

356 a subset of LDTs, and that another group of LDTs may function along with PBP1a  
357 during polar growth, consistent with the observation of HADA labeling at the growth  
358 pole.

359

### 360 **Faropenem treatment inhibits polar growth in the Rhizobiales**

361 Since species in the Rhizobiales have a large number of LD-transpeptidase enzymes (*A.*  
362 *tumefaciens* encodes 14 LDTs), deleting them all is a significant undertaking.  $\beta$ -lactam  
363 antibiotics are one of the most widely used classes of antibiotics that target cell wall  
364 synthesis enzymes, and these have been primarily studied for their ability to target  
365 PBPs [44]. A subclass of  $\beta$ -lactam antibiotics known as the carbapenems, including the  
366 penem antibiotic faropenem, are, however, useful for probing the activity of LDTs [45,  
367 46]. Therefore, to characterize the global contribution of LDT activity during *A.*  
368 *tumefaciens* growth, we investigated the effect of five carbapenem antibiotics and one  
369 penem antibiotic on cell growth and morphology. In *A. tumefaciens*, we find that  
370 treatment with meropenem or faropenem leads to an overall decrease in PG  
371 crosslinkage, including both LD- and DD-crosslinks (Figure 5A, Supplemental Figure 5),  
372 suggesting that the targets of these drugs impact cell wall biosynthesis.

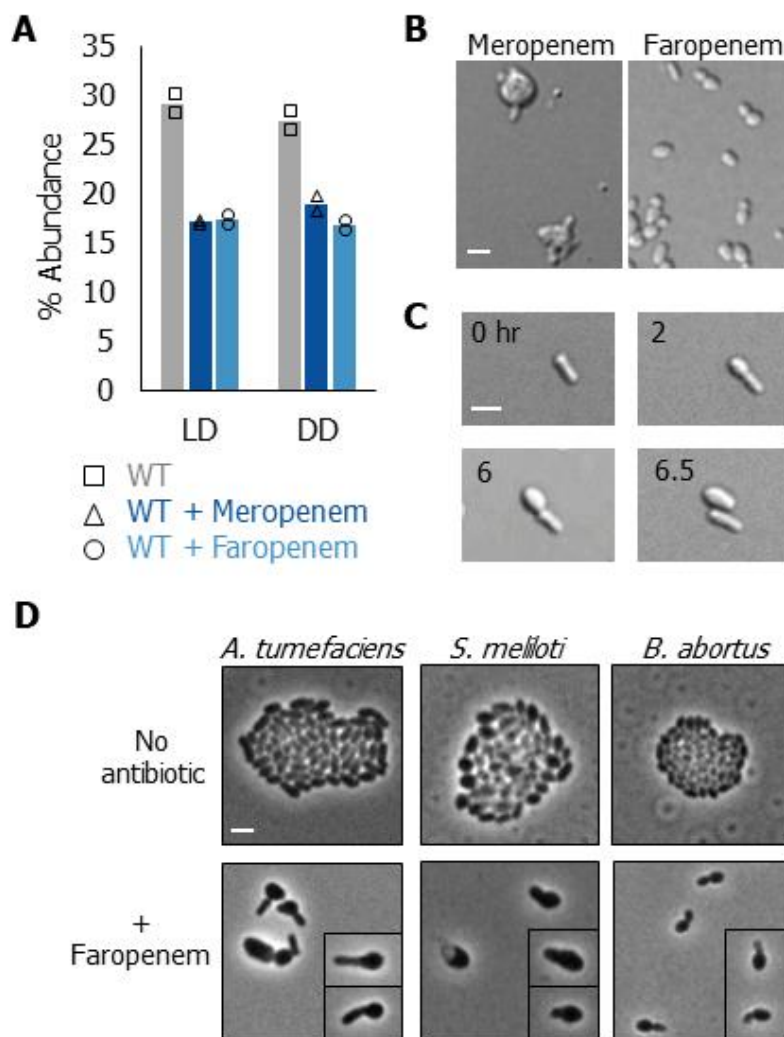

373

374 **Figure 5. Phenotypic characterization of carbapenem and penem antibiotic treatments. (A)**  
375 Abundance of total LD- and DD-crosslinkages in PG isolated from wild-type cells, wild-type cells grown in  
376 the presence of 1.5 µg/mL meropenem for 4 hours, and wild-type cells grown in the presence of 1.5  
377 µg/mL of faropenem for 6 hours. Timepoints were chosen based on the onset of phenotypic changes.  
378 Data shown are the total abundance of the muropeptides containing LD- or DD-crosslinks from analysis of  
379 two independent samples. **(B)** Representative images of wild-type cells grown in the presence of 1.5  
380 µg/mL meropenem and faropenem. Cells were incubated with antibiotics for 24 hours, then spotted on a  
381 1% agarose pad and imaged using DIC microscopy. Scale bar: 2 µm **(C)** Time-lapse microscopy of wild-  
382 type cells spotted on a 1% ATGN agarose pad supplemented with 1.5 µg/mL of faropenem; images were  
383 acquired every 10 minutes. Indicated time in hours is shown. Scale bar: 2 µm **(D)** Representative phase  
384 microscopy images of *A. tumefaciens*, *S. meliloti*, or *B. abortus* grown overnight in ATGN, Tryptone-Yeast  
385 (TY) Extract or Brucella Broth, respectively, to an OD<sub>600</sub> of 0.6 and spotted on a 1% ATGN agarose pad  
386 with or without 1.5 µg/mL faropenem. Cells were imaged after 16 hours of growth. Scale bar: 2 µm.

387

388 To better understand the impacts of these antibiotics, we observed morphological  
389 changes induced by drug treatment. Treatment with sub-minimum inhibitory  
390 concentrations (MIC) treatments with any of five carbapenem antibiotics: meropenem,  
391 imipenem, doripenem, ertapenem, or tebipenem for 24 hours induced mid-cell swelling  
392 (Figure 5B, Supplementary Figure 6). These data indicated that these carbapenem  
393 antibiotics may target an enzyme(s) with a specific role at the septum during cell  
394 division. Interestingly, faropenem-treated cells became wider and rounder after 24-hour  
395 exposure (Figure 5A), which pointed to the cellular target of faropenem as being  
396 important for the maintenance of rod shape during polar growth. In agreement, time-  
397 lapse microscopy of faropenem-treated cells revealed a loss of rod shape preferentially  
398 in the daughter compartment. Remarkably, following cell division the daughter cell  
399 which inherits the growth pole is large and round whereas the daughter cell inheriting  
400 the old growth pole retains its rod shape (Figure 5B, Supplemental movie 3). This  
401 phenotype was distinct from that associated with the treatment of the other carbapenem  
402 antibiotics and indicated that the cellular target(s) of faropenem was important to  
403 maintain proper PG integrity in the growth pole compartment.

404

405 The phenotype of faropenem-treated cells, along with the growth-independent labelling  
406 of HADA along the sidewalls of the new pole (Supplemental figure 6) suggested that the  
407 old and new cell compartments may have a distinct repertoire of PG synthesis enzymes  
408 that help to confer polar identity between the daughter cells. To determine if the cellular  
409 target(s) of faropenem were conserved in other Rhizobiales we treated the closely  
410 related plant symbiont *S. meliloti* and the obligate intracellular pathogen *B. abortus* with

411 sub-lethal concentrations of faropenem. We observed swelling of the growth pole in *A.*  
412 *tumefaciens*, *S. meliloti*, and *B. abortus* (Figure 5D). Thus, we have identified the  $\beta$ -  
413 lactam antibiotic faropenem as a specific antibiotic inhibitor of polar growth among the  
414 Rhizobiales. Altogether, these data suggest that cell wall enzymes that are important for  
415 polar growth have a conserved role in agriculturally and medially important species of  
416 Rhizobiales.

417

### 418 **The essentiality of PBP1a is conserved among the Rhizobiales**

419 Since faropenem targeting of the growth pole machinery is conserved, we sought to  
420 determine if the essential role of PBP1a is also conserved in other Rhizobiales. We found  
421 that treatment of *B. abortus* with the PBP1a-specific GTase inhibitor flavomycin  
422 (moenomycin) [47] led to growth arrest and the formation of large, round cells (Figure  
423 6B). Consistent with our findings that treatment of *B. abortus* with the PBP1a inhibitor  
424 flavomycin causes cells to lose their rod-shape, a transposon mutagenesis screen of *B.*  
425 *abortus* predicted that out of the bifunctional PBPs, only PBP1a may be essential for  
426 growth [48]. In line with this, Bandara and colleagues were unable to obtain a PBP1a  
427 mutant in *Brucella melitensis*, indicating that PBP1a is likely essential for viability [49].

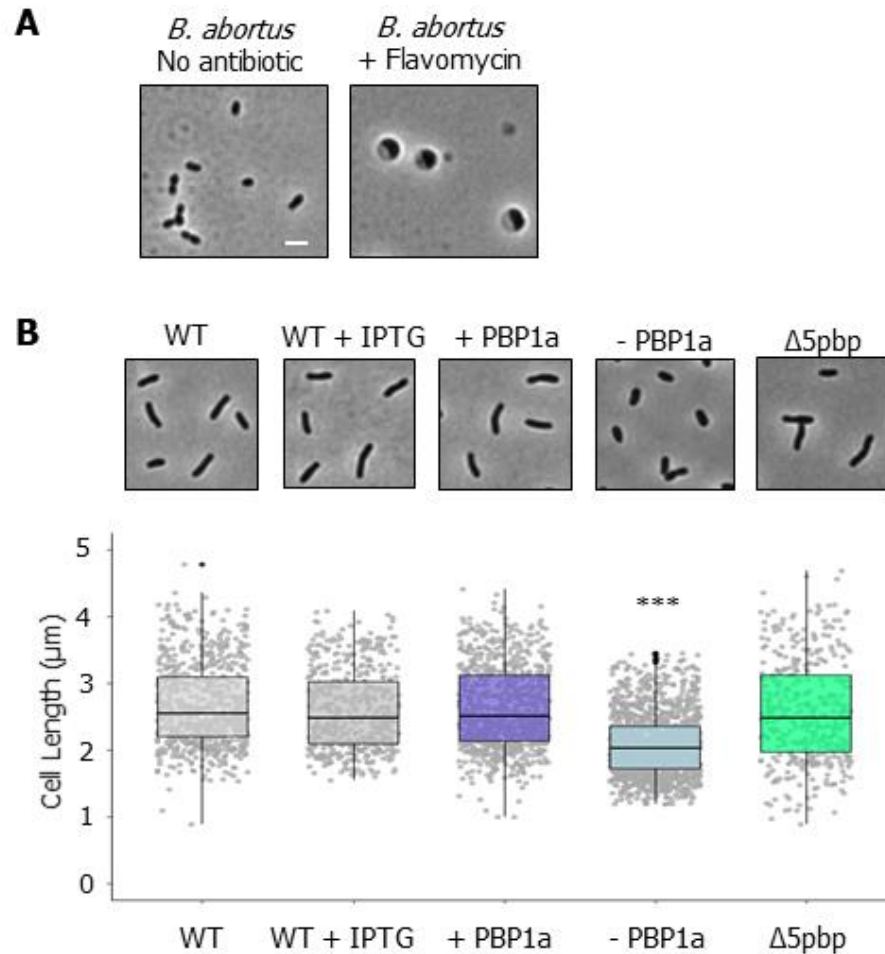

428

429 **Figure 6. Mechanisms of polar growth are conserved in the Rhizobiales *Brucella* and**  
430 ***Sinorhizobium*.** (A) Representative phase microscopy images of *B. abortus* grown overnight without  
431 antibiotic, with 20  $\mu\text{g}/\text{mL}$  of flavomycin, or with 1.5  $\mu\text{g}/\text{mL}$  of faropenem, after 16 hours cells were spotted  
432 on a 1% Brucella Broth agarose pad and imaged. (B) Top panel: phase microscopy images showing the  
433 phenotypes of *S. meliloti* wildtype (WT) and PBP mutants. Each strain was grown to exponential phase,  
434 spotted on a 1% TY agarose pad, and imaged by phase microscopy. Bottom panel: cell length  
435 distributions of PG synthase mutants. The indicated strains were grown to exponential phase, spotted on  
436 an agarose pad, imaged by phase microscopy, and subjected to cell lengths measurements using  
437 MicrobeJ [24]. The data are shown as box plots in the style of Tukey [25]. Distributions of cells  
438 significantly different from wildtype are indicated (\*\*\*; One-Way ANOVA with Bonferroni correction,  $p <$   
439  $2 \times 10^{-16}$ ).  $n = >400$  per strain.

440



441 Next, we explored the function of PBPs in the closely related plant symbiont *S. meliloti*.  
442 *S. meliloti* encodes six bifunctional PBP homologs, including one PBP1a homolog, four  
443 PBP1b homologs, and one PBP1c homolog. We constructed a  $\Delta 5\text{pbp}$  mutant, which is  
444 lacking all four PBP1b homologs and the PBP1c homolog. The  $\Delta 5\text{pbp}$  mutant had a  
445 median cell length similar to that of wild-type *S. meliloti*, but with a slightly broader  
446 distribution of cell lengths, with ~88% of cells falling between 1.5 and 4  $\mu\text{m}$  compared to  
447 ~97% of WT cells falling between these cell lengths. Interestingly, the  $\Delta 5\text{pbp}$  mutant  
448 retained its rod shape, similar to the  $\Delta 3\text{pbp}$  mutant of *A. tumefaciens*, suggesting that  
449 these enzymes contribute minimally to sustaining proper rod shape under standard  
450 growth conditions.

451  
452 Similar to our findings for *A. tumefaciens*, we were unable to make a deletion of *pbp1a*,  
453 so we constructed a PBP1a depletion strain. Depletion of PBP1a led to a severe  
454 viability defect (Supplementary Figure 7A) and cells became shorter (Figure 6B) and  
455 wider (Supplementary Figure 7B). Thus, PBP1a is essential for polar growth and  
456 maintenance of proper rod shape in both *S. meliloti* and *A. tumefaciens*. Taken  
457 together, our data from *B. abortus*, *S. meliloti* and *A. tumefaciens* support the notion that  
458 PBP1a plays an essential and conserved role in polar growth among the Rhizobiales.

459

## 460 **DISCUSSION**

461 Bacteria employ widely diverse growth strategies. Unipolar growth, or incorporation of  
462 new cell wall material at a single pole, is a shared mode of growth among the

463 Rhizobiales, but the mechanisms that drive polar PG insertion remain poorly  
464 understood. Most bacteria have multiple class A PBPs with semi-redundant functions  
465 and growth is supported by the presence of any one of the PBPs [50] In *C. crescentus*,  
466 four class A PBPs can support growth when expressed alone. [51] In *B. subtilis*, all 4  
467 class A PBPs are dispensable and the SEDS protein RodA has likely taken over the  
468 essential function of the class A PBPs during elongation [52] In contrast, here we  
469 identified the class A PBP1a homolog as an essential protein needed to synthesize PG  
470 at the growth pole in *A. tumefaciens* and related genera, despite the presence of other  
471 class A PBPs. Current findings support the proposal that in laterally growing bacterial  
472 species, PBP1a homologs act as autonomous entities involved in PG remodeling or  
473 repair and do not function as a part of the core elongasome [15, 16]. Instead, the  
474 monofunctional glycosyltransferase RodA and the monofunctional transpeptidase PBP2  
475 are required to maintain rod-shape [10, 53]. In contrast, we find that in the Rhizobiales,  
476 which lack MreB, RodA and PBP2 homologs, the bifunctional enzyme PBP1a is an  
477 essential core component of the elongasome of polar growing Rhizobiales. Loss of  
478 class A PBPs in *E. coli* or *B. subtilis* led to a decrease in cell width [54, 55]. Conversely,  
479 depletion of PBP1a in *A. tumefaciens* and *S. meliloti* led to a significant decrease in cell  
480 length and an increase in cell width (Figure 1B, C, Supplementary Figure 1B). This  
481 indicates that cells lacking PBP1a have a shorter period of cell elongation, and as a  
482 result, likely spend more time synthesizing the septum (Figure 3C, Supplementary  
483 Figure 3A, B). Thus, the regulation of PG synthesis that governs cell length and cell  
484 width in the Rhizobiales utilizes a novel mechanism compared to well-studied model  
485 bacteria. Perhaps because class A PBPs function independently of cytoskeletal

486 complexes [10], PBP1a was freely available to assume the role of the primary enzyme  
487 driving polar PG synthesis prior to the loss of the *mre* operon. Notably, the other  
488 bifunctional PBPs minimally contributed to the maintenance of proper rod shape under  
489 the conditions tested in *A. tumefaciens* and *S. meliloti*. However, it is likely that the  
490 additional class A PBPs may make dedicated contributions under specific growth  
491 conditions. For example, in *E. coli*, PBP1a homologs are required for optimal growth in  
492 alkaline pH, while PBP1b homologs are required under acidic conditions [56]. Since the  
493 plant rhizosphere is an acidic environment [57], it is possible that the remaining  
494 bifunctional PBPs have specialized functions to maintain growth when bacteria are  
495 associated with a plant host. Additionally, duplication of the monofunctional PBP3  
496 homolog among the Rhizobiales is restricted to a few species that interact with plants,  
497 suggesting this is not a broad solution to the loss of PBP2, but that PBP3b homologs  
498 may contribute more significantly to bacterial growth in plantae. In agreement with this  
499 idea, we found that of the two monofunctional PBP homologs (PBP3a and PBP3b),  
500 PBP3a - a clear homolog of the division-specific PBP3 - contributes to cell division,  
501 while deletion of *pbp3b* plays a minimal role in cell growth or cell shape under standard  
502 laboratory conditions but forms a synthetic lethal pair with PBP3a that functions in cell  
503 division.

504

505 In laterally growing bacterial species, the role of scaffolding PG synthase enzymes  
506 during elongation is fulfilled in part by the actin homolog MreB [58]. Homologs of  
507 MreBCD are absent in the Rhizobiales; thus, how PBP1a is recruited to the growth pole  
508 and how its activity is regulated remains unexplored. Recently, GPR (for Growth Pole

509 Ring), a large (~226 kDa) apolipoprotein with similarity to the polar organizing protein  
510 TipN from *C. crescentus*, was reported to form a ring at the growth pole in *A.*  
511 *tumefaciens*, with depletion of this protein leading to rounded cells [59]. This phenotype  
512 implicates GPR as a possible candidate to scaffold PG enzymes during elongation. In  
513 addition, PG synthesis by PBP1a also requires hydrolysis of the existing sacculus to  
514 allow for insertion of new muropeptides. A DD-endopeptidase (RgsM) that is predicted to  
515 have hydrolysis activity was recently shown to be essential for polar growth in *S. meliloti*  
516 [60], and thus represents an interesting candidate for polar PG hydrolysis.

517

518 Several lines of evidence suggest that FDAAs are primarily incorporated into the cell  
519 wall through remodeling by LDTs [41, 42, 61, 62]. Cells depleted of PBP1a label  
520 robustly at the growth pole with FDAAs, independently of PBP-mediated FDAAD  
521 labeling. We also found that FDAAs label WT cells along the sidewalls of the new pole  
522 much more brightly than the old pole. This points to a role for LDTs in not only polar  
523 growth, but also sidewall remodeling of the new pole daughter cell (Figure 7).  
524 Collectively, our results indicate that at the pole in *A. tumefaciens* FDAAD probes report  
525 on nascent PG synthesis by PBP1a, whereas FDAAs are incorporated by the localized  
526 activity of LD-transpeptidases on the bacterial cell surface. These findings demonstrate  
527 the usefulness of FDAAD probes for distinguishing between growth-dependent, nascent  
528 cell wall synthesis and growth-independent cell wall remodeling. In particular, the  
529 growth pattern of species for which a high proportion of growth-independent remodeling  
530 occurs can be obscured by FDAAs. Therefore, FDAADs are more useful in  
531 distinguishing nascent PG synthesis mediated by PBPs.

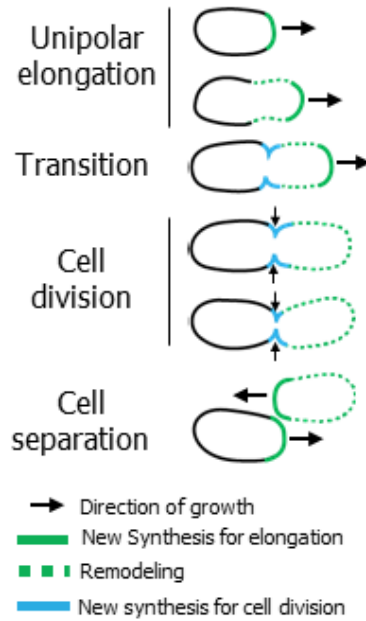

532

533 **Figure 7. Model of cell wall synthesis in the Rhizobiales. Unipolar elongation:** *A. tumefaciens*  
534 elongates from a single pole using the action of an essential PBP1a homolog. As the cell gets longer, the  
535 sidewalls of the new pole begin to be remodeled in a growth-independent manner, through the activity of  
536 LD-transpeptidases. **Transition:** prior to cell division growth at the pole is terminated and growth at the  
537 midcell is initiated, while remodeling of the new pole compartment continues. **Cell division:** during cell  
538 division new PG is added at the midcell through the transpeptidase activity of two class B PBPs (with  
539 PBP3a being the primary synthase) and the glycosyltransferase FtsW. **Cell separation:** after cell  
540 separation, the new poles resume polar elongation from what was the site of cell division. Continuous  
541 remodeling of the new pole daughter cell occurs throughout the cell cycle and is inherited into the new  
542 pole daughter cell.

543

544

545 Since LDTs are resistant to most classes of  $\beta$ -lactam antibiotics [63], crosslinking the  
546 cell wall via LDTs may contribute to the high antibiotic resistance to  $\beta$ -lactam antibiotics  
547 in the Rhizobiales. Here, we show that meropenem and faropenem inhibit LD- and DD-  
548 transpeptidation in *A. tumefaciens*, indicating that they may target LDTs and/or PBPs.  
549 Perhaps the loss of LDT activity disrupts the activity of high molecular weight PBPs if  
550 they function together in a growth pole complex. A combination of LDT and PBP-  
551 targeting antibiotics acted synergistically in killing *M. tuberculosis* [52], and a similar  
552 approach may also be effective against species in the Rhizobiales. Since faropenem  
553 causes swelling of the growth pole in *A. tumefaciens*, *S. meliloti* and *B. abortus* it is  
554 likely that the target(s) of this drug are conserved components of the growth machinery.  
555 Identification of the specific cellular target(s) of faropenem will provide candidate  
556 proteins for further characterization.

557

558 Expanding our understanding of the mechanism of polar growth in the Rhizobiales will  
559 help to shed light on the different strategies that can be employed by bacteria during cell  
560 elongation. Indeed, our findings highlight intriguing parallels with other, distantly related,  
561 polarly growing bacteria including the Actinobacteria. For example, PBP1a is essential  
562 in *Mycobacterium smegmatis* [64], an Actinobacteria that grows by bipolar elongation. In  
563 addition, PBP1a localizes to growth poles and is important for maintenance of rod  
564 shape in other Actinobacteria [65, 66]. Therefore, the reliance on PBP1a for synthesis of  
565 PG at the pole may be a key feature of polar-growing bacteria that arose independently  
566 in the Rhizobiales and Actinobacteria, indicating convergent evolution. Notably, the cell  
567 wall of polar-growing bacteria in both clades also contain a high proportion (~30-80%) of

568 LDT-crosslinked PG [1, 67, 68], suggesting that LD-crosslinks may provide structural  
569 integrity. Furthermore, in *Mycobacterium* deletion of LDT-encoding genes leads to a  
570 loss of rod-shape [63], and LDTs also contribute to active PG synthesis of the sidewalls  
571 [37]. Finally, carbapenem antibiotics are routinely used to treat *M. tuberculosis*  
572 infections [20] hinting that the target of these drugs may be important in polar growing  
573 bacteria. Future work directed at characterizing the role of LDTs during polar growth in  
574 Rhizobiales and Actinobacteria is needed to determine if the high degree of LD-  
575 crosslinking is an innovation which allows for polar elongation to be adopted as the  
576 primary mode of growth. Overall, the possibility that there may be governing principles  
577 which allow for polar growth to emerge as a successful growth strategy is a fascinating  
578 concept which merits further study.

579

## 580 **Acknowledgements**

581 We thank Zachary Taylor, Edward Hall, and Srinivas Tekkam for synthesis of cell wall  
582 probes and Gyanu Lamichhane for the generous gift of the penem and carbapenem  
583 antibiotics. We thank members of Jerod Skyberg's lab for providing lab space and  
584 materials to work on *B. abortus*. We also thank members of the Brown lab and Marie  
585 Elliot for helpful discussions and critical reading of this manuscript. PB and MW were  
586 supported by the National Science Foundation, IOS1557806. MW was supported by the  
587 Life Sciences Fellowship at the University of Missouri. Research in the Cava lab (FC,  
588 AA) is supported by the Laboratory for Molecular Infection Medicine Sweden, the Knut  
589 and Alice Wallenberg Foundation, the Kempe Foundation and the Swedish Research  
590 Council. AA is supported by a MIMS/VR PhD position. EK was supported by the Life

591 Sciences Research Foundation (LSRF) at the Harvard Medical School. AB received  
592 funding from the German Research Foundation (Project 269423233 - TRR 174). NIH  
593 grants R35GM122556 to YVB and GM113172 and to MSV and YVB and  
594 R35GM136365 to MSV. YVB is also supported by a Canada 150 Research Chair in  
595 Bacterial Cell Biology funded by the Canadian Institutes of Health Research.

596

## 597 **MATERIALS AND METHODS**

598 **Bacterial strains, plasmids, and growth conditions.** A list of all bacterial strains used  
599 in this study is provided in Supplemental Table 1. *Agrobacterium tumefaciens* C58 and  
600 derived strains were grown in ATGN minimal media [69] without exogenous iron at 28°C  
601 with shaking. When appropriate, kanamycin (KAN) was used at the working  
602 concentration of 300 µg/ml. When indicated, isopropyl β-D-1-thio-galactopyranoside  
603 (IPTG) was used as an inducer at a concentration of 1 mM. *Sinorhizobium meliloti*  
604 strains were grown in Tryptone-Yeast (TY) medium. When appropriate, KAN was used  
605 at the working concentration of 100 µg/ml, Gentamicin (GM) was used as 20 µg/ml, and  
606 IPTG was used at a concentration of 500 µg/ml. *Brucella abortus* strain S19 was grown  
607 in brucella broth. *E. coli* strains were grown in Luria-Bertani medium at 37°C. For *E. coli*  
608 DH5α and S17-1 λ *pir*, when appropriate 50 µg/ml or 30 µg/ml of KM, respectively, was  
609 added.

610

611 **Construction of strains and plasmids.** A list of all primers used in this study is  
612 provided in Supplemental Table 2. For amplification of target genes, primer names



613 indicate the primer orientation and added restriction sites. All expression vectors were  
614 verified by sequencing. All vectors were introduced into *A. tumefaciens* strains utilizing  
615 standard electroporation protocols [70] with the addition of IPTG in the media when  
616 introducing plasmids into depletion backgrounds.

617

618 **Construction of deletion/depletion plasmids and strains.** Vectors for gene deletion  
619 by allelic exchange were constructed using recommended methods for *A. tumefaciens*  
620 [70]. Briefly, 500-bp fragments upstream and 500 bp downstream of the target gene  
621 were amplified using primer pairs P1/P2 and P3/4 respectively. Amplicons were spliced  
622 together by SOEing using primer pair P1/P4. The amplicon was digested and ligated  
623 into pNTPS139. The deletion plasmids were introduced into *A. tumefaciens* by mating  
624 using an *E. coli* S17 conjugation strain to create KM resistant, sucrose sensitive primary  
625 integrants. Primary integrants were grown overnight in media with no selection.  
626 Secondary recombinants were screened by patching for sucrose resistance and KM  
627 sensitivity. Colony PCR with primers P5/P6 for the respective gene target was used to  
628 confirm deletion. PCR products from P5/P6 primer sets were sequenced to further  
629 confirm deletions.

630 For depletion strain construction, target genes (*pbp1a* or *pbp3a*) were amplified,  
631 digested and ligated into pUC18-mini-Tn7T-GM-P<sub>lac</sub>. The mini-Tn7 vector, along with  
632 the pTNS3 helper plasmid, were introduced into C58Δ*tetRA*::a-*att*Tn7 as described  
633 previously [27]. Transformants were selected for GM resistance and insertion of the  
634 target gene into the a-*att* site was verified by colony PCR using the tet forward and  
635 Tn7R109 primer. PCR products were sequenced to confirm insertion of the correct

636 gene. Next, the target gene was deleted from the native locus as described above in the  
637 presence of 1 mM IPTG to drive expression of the target gene from the engineered site.

638 To generate the *S. meliloti* strain lacking the five non-essential PBPs, the  
639 corresponding genes were consecutively deleted from the Rm2011 *rgsP-egfp* genome  
640 using the sucrose selection method. [71] To generate the *S. meliloti* MrcA1 depletion  
641 strain, first plasmid pK18mobsac-mrcA1del was integrated into the Rm2011 *rgsP-egfp*  
642 genome, then an ectopic *mrcA1* copy was introduced on plasmid pGCH14-mrcA1  
643 followed by sucrose selection of mutant clones with deletion of the native *mrcA1* allele.  
644 The curable plasmid pGCH14, which is maintained in single copy in *S. meliloti* due to  
645 the replication operon *repABCpMlb\_lacO*, prone to repression by LacI was used as  
646 vector to conditionally establish the ectopic copy of *mrcA1* under control of its native  
647 promoter. pSRKKm, carrying *lacI*, was introduced into the strain with chromosomal  
648 deletion of *mrcA1*, carrying pGCH14-mrcA1, and the resulting strain Rm2011 *rgsP-egfp*  
649 *mrcA1<sup>dpl</sup>* was grown in presence of 500  $\mu$ M IPTG. Growth in the absence of IPTG  
650 induced MrcA1 depletion due to loss of the ectopic *mrcA1* copy.

651

652 **Phase and Fluorescence microscopy.** A small volume (~1  $\mu$ l) of cells in exponential  
653 phase ( $OD_{600} = 0.2 - 0.4$ ) was applied to a 1% ATGN agarose pad as described  
654 previously [72]. DIC, Phase contrast and epifluorescence microscopy were performed  
655 with an inverted Nikon Eclipse TiE and a QImaging Rolera em-c2 123 1K EMCCD  
656 camera with Nikon Elements Imaging Software. For time-lapse microscopy, images  
657 were collected every ten minutes, unless otherwise stated.

658

659 **Quantification of cell length distributions.** Cells were grown overnight in ATGN.  
660 Cells were diluted in ATGN to an  $OD_{600} = 0.2$  and allowed to grow until reaching an  
661  $OD_{600} = 0.4 - 0.6$ . Live cells were imaged using phase contrast microscopy and cell  
662 length distributions of the indicated number of cells per strain were determined using the  
663 longest medial axis as measured by MicrobeJ software [24].

664

665 **Quantification of cell morphologies, FDAA and FDAAD labeling patterns.** For *A.*  
666 *tumefaciens*, cells were grown overnight in ATGN media and diluted in the same  
667 conditions to an  $OD_{600} = 0.20$  and allowed to grow until reaching an  $OD_{600} = 0.4 - 0.6$ . At  
668 this point cells were labeled with 1mM of the fluorescent-D-amino acid (FDAA) HCC-  
669 amino-D-alanine (HADA) or the fluorescent dipeptide (FDAAD) NBD-amino-D-alanine-D-  
670 alanine (HADA—DA) as previously described [36, 38, 41]. Immediately following a five-  
671 minute incubation, cells were ethanol fixed to prevent further growth. Phase contrast  
672 and epifluorescence microscopy was performed on the reported number of cells. For *E.*  
673 *coli*, cells were grown overnight at 37°C in M9 + 0.2% glucose minimal medium and  
674 diluted in the same conditions to an  $OD_{600} = 0.1$  and allowed to grow until reaching an  
675  $OD_{600} = 0.4 - 0.6$ . At this point cells were labeled with 1 mM of HADA—DA. After an  
676 incubation of 90 minutes cells were ethanol fixed and washed 3 times in 1 mL PBS  
677 before imaging. For *B. subtilis* 3610, cells were grown overnight at 37°C in S750 + 1%  
678 glucose defined minimal medium and diluted in the same conditions to an  $OD_{600} = 0.1$   
679 and allowed to grow until reaching an  $OD_{600} = 0.4 - 0.6$ . At this point cells were labeled  
680 with 5 mM of HADA—DA. After an incubation of 120 minutes cells were ethanol fixed  
681 and washed 3 times in 1 mL PBS before imaging. For *S. venezuelae*, cells were grown

682 overnight at 30 °C in LB medium and diluted in the same conditions to an  $OD_{600} = 0.1$   
683 and allowed to grow until reaching an  $OD_{600} = 0.4 - 0.6$ . At this point cells were labeled  
684 with 1 mM BODIPY FL-amino-d-alaninyl-D-alanine (BADA—DA). After an incubation of  
685 15 minutes, cells were washed once with 1 mL LB and resuspended in 500  $\mu$ L LB  
686 containing 2 mM HADA—DA. After an incubation of 15 minutes, cells were washed  
687 once with 1 mL LB and resuspended in 500  $\mu$ L LB containing 1 mM ATTO 610-amino-d-  
688 alaninyl-D-alanine (Atto610ADA—DA). After an incubation of 15 minutes cells were  
689 ethanol fixed and washed 3 times in 1 mL PBS before imaging.

690  
691 Demographs were constructed using MicrobeJ. For demographs, cells were arranged  
692 from top to bottom according to their cell lengths and each cell was oriented such that  
693 the new pole (defined as the cell pole with the higher fluorescence intensity as  
694 determined by FDAA or FDAAD labeling or the smaller pole diameter in cells without  
695 label) was oriented to the right.

696

### 697 **Synthesis of HADA—DA.**

698

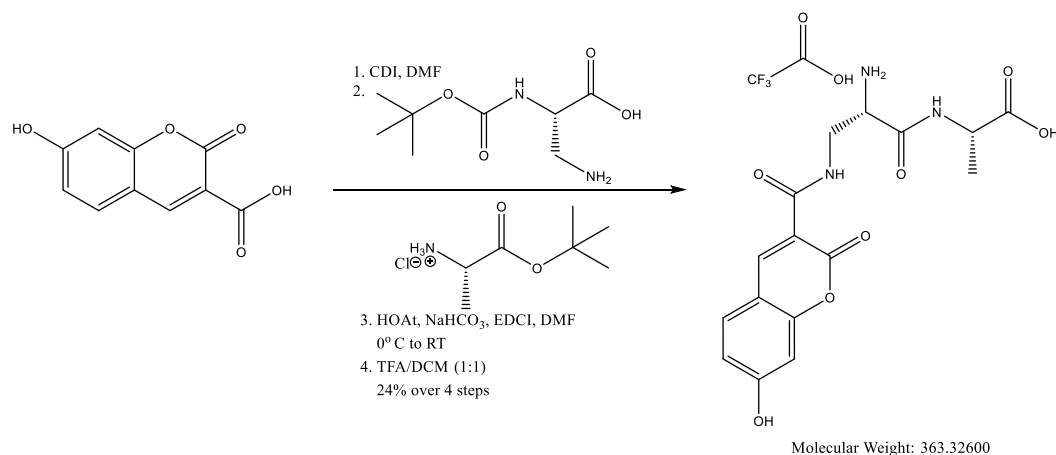

699  
700

701 A solution of 7-hydroxycoumarin-3-carboxylic acid (HCC) (105 mg, 0.51 mmol) and  
702 carbonyldiimidazole (83 mg, 0.51 mmol) in anhydrous DMF (5 mL) was stirred at room  
703 temperature (RT) for 2 h under an atmosphere of argon. Boc-D-2,3-diaminopropionic  
704 acid (104 mg, 0.51 mmol) was then added and the reaction mixture was allowed to stir  
705 at RT for 18 h. DMF was removed *in vacuo*. The residue was diluted with EtOAc (35  
706 mL), washed with 1N HCl (20 mL) and water (30 mL). The combined aqueous layers  
707 are back-extracted with EtOAc (20 mL). The combined organic layers were washed with  
708 brine (20 mL), dried over sodium sulfate, filtered, and concentrated to dryness. The  
709 crude product was dissolved in anhydrous DMF. D-alanine tert-butyl ester hydrochloride  
710 (111 mg, 0.612 mmol), HOAt (83.5 mg, 0.612 mmol) and NaHCO<sub>3</sub> (94 mg, 1.12 mmol)  
711 were added successively, and the reaction mixture was cooled to 0 °C. EDCI (117 mg,  
712 0.612 mmol) was then added, and the reaction mixture was stirred for 12 h. The solvent  
713 was removed in *vacuo* and the product was diluted with EtOAc, washed with 1N HCl,  
714 water, brine, dried over sodium sulfate, filtered and concentrated. The crude product  
715 was dissolved in DCM/TFA (1:1, 4 mL) mixture, stirred for 1 h and evaporated to  
716 dryness. The yellow color solid was dissolved in acetonitrile/water and purified by  
717 reverse phase HPLC and lyophilized to yield the desired product as a pale yellow solid  
718 (63 mg, 26 %). <sup>1</sup>H NMR (500 MHz, DMSO-*d*<sub>6</sub>) 11.37 (br s, 1H), 8.91 (m, 1H), 8.90 (m,  
719 1H), 8.81 (s, 1H), 8.42 (br s, 3H), 7.83 (m, 1H), 5.94 (m, 1H), 5.89 (s, 1H), 4.24 (m, 1H),  
720 4.04 (br s, 1H), 3.77 (m, 1H), 3.68 (m, 1H), 1.32 (s, 1H); HRMS-ESI-TOF m/z calc  
721 C<sub>16</sub>H<sub>18</sub>N<sub>3</sub>O<sub>7</sub> (M+H) 364.1145, Found 364.1161.

722

723 **PG compositional analysis.**

724 For PG analysis, three cultures of each of strain were grown overnight in 3 ml culture  
725 tubes of ATGN minimal media at 28°C with shaking; the + PBP1a strain was  
726 supplemented with 1mM IPTG. The 3 ml cultures were then added to 50 ml flasks of  
727 fresh ATGN and allowed to grow under the same conditions until reaching an  
728 exponential phase OD<sub>600</sub> of 0.5-0.6. Cells were then pelleted by centrifugation at 4000 x  
729 g for 10 minutes. Cell pellets were washed three times with ATGN by centrifugation and  
730 resuspension to remove IPTG. After the final wash, the 3 cell pellets from the + PBP1a  
731 strain were split and resuspended in 50 ml ATGN with or without IPTG. Each culture  
732 was grown for 16 hours (hr). to an OD<sub>600</sub> of 0.6 After 146 h of growth, 50 ml of the  
733 exponential cultures were collected and pelleted by centrifugation at 4000 x g for 20  
734 minutes. Cell pellets were resuspended in 3 mL of ATGN and 6 mL of 6% SDS and  
735 stirred with magnets while boiling for 4 h. Next, samples were removed from heat but  
736 continued to stir overnight. Samples were then shipped to Cava laboratory for  
737 purification and analysis. Upon arrival, cells were boiled and simultaneously stirred by  
738 magnets for 2 h. After 2 h, boiling was stopped, and samples were stirred overnight. PG  
739 was pelleted by centrifugation for 13 minutes (min) at 60,000 rpm (TLA100.3 Beckman  
740 rotor, Optima Max-TL ultracentrifuge; Beckman), and the pellets were washed 3 to 4  
741 times by repeated cycles of centrifugation and resuspension in water. The pellet from  
742 the final wash was resuspended in 50 µl of 50 mM sodium phosphate buffer, pH 4.9,  
743 and digested overnight with 100 µg/ml of muramidase at 37°C. Muramidase digestion  
744 was stopped by boiling for 4 min. Coagulated protein was removed by centrifugation for  
745 15 min at 15,000 rpm in a desktop microcentrifuge. The muropeptides were mixed with  
746 15 µl 0.5 M sodium borate and subjected to reduction of muramic acid residues into

747 muramitol by sodium borohydride (10 mg/ml final concentration, 20 min at room  
748 temperature) treatment. Samples were adjusted to pH 3 to 4 with orthophosphoric acid  
749 and filtered (0.2- $\mu$ m filters). Analysis of muropeptides was performed on an ACQUITY  
750 Ultra Performance Liquid Chromatography (UPLC) BEH C18 column, 130Å, 1.7  $\mu$ m, 2.1  
751 mm x 150 mm (Water, USA) and detected at Abs. 204 nm with ACQUITY UPLC UV-  
752 visible detector. For data shown in Figure 4B and Supplementary Figure 7B,  
753 muropeptides were separated with organic buffers at 45°C using a linear gradient from  
754 buffer A (formic acid 0.1% (v/v) in water) to buffer B (formic acid 0.1% (v/v) in  
755 acetonitrile) in a 18 minutes run with a 0.25 ml/min flow. For data shown in Figure 5A  
756 and Supplementary Figure 5A, muropeptides were separated using a linear gradient  
757 from buffer A (sodium phosphate buffer 50 mM pH 4.35) to buffer B (sodium phosphate  
758 buffer 50 mM pH 4.95 methanol 15% (v/v)) with a flow of 0.25 mL/min in a 20 min run.  
759 Individual muropeptides were quantified from their integrated areas using samples of  
760 known concentration as standards. Muropeptide abundance was statistically compared  
761 using a one-way ANOVA with Tukey's multiple comparisons test.

762

## 763 REFERENCES

- 764 1. Brown, P.J., et al., *Polar growth in the Alphaproteobacterial order Rhizobiales*.  
765 Proc Natl Acad Sci U S A, 2012. **109**(5): p. 1697-701.
- 766 2. Batut, J., S.G. Andersson, and D. O'Callaghan, *The evolution of chronic infection*  
767 *strategies in the alpha-proteobacteria*. Nat Rev Microbiol, 2004. **2**(12): p. 933-45.
- 768 3. Randich, A.M. and Y.V. Brun, *Molecular mechanisms for the evolution of*  
769 *bacterial morphologies and growth modes*. Front Microbiol, 2015. **6**: p. 580.
- 770 4. Escobar, M.A. and A.M. Dandekar, *Agrobacterium tumefaciens as an agent of*  
771 *disease*. Trends Plant Sci, 2003. **8**(8): p. 380-6.
- 772 5. Mansfield, J., et al., *Top 10 plant pathogenic bacteria in molecular plant*  
773 *pathology*. Mol Plant Pathol, 2012. **13**(6): p. 614-29.

- 774 6. Kuru, E., et al., *Mechanisms of Incorporation for D-Amino Acid Probes That*  
775 *Target Peptidoglycan Biosynthesis*. ACS Chem Biol, 2019. **14**(12): p. 2745-2756.
- 776 7. Vollmer, W. and U. Bertsche, *Murein (peptidoglycan) structure, architecture and*  
777 *biosynthesis in Escherichia coli*. Biochim Biophys Acta, 2008. **1778**(9): p. 1714-  
778 34.
- 779 8. Typas, A., et al., *From the regulation of peptidoglycan synthesis to bacterial*  
780 *growth and morphology*. Nat Rev Microbiol, 2011. **10**(2): p. 123-36.
- 781 9. Yoshida, H., et al., *Crystal structures of penicillin-binding protein 3 (PBP3) from*  
782 *methicillin-resistant Staphylococcus aureus in the apo and cefotaxime-bound*  
783 *forms*. J Mol Biol, 2012. **423**(3): p. 351-64.
- 784 10. Cho, H., et al., *Bacterial cell wall biogenesis is mediated by SEDS and PBP*  
785 *polymerase families functioning semi-autonomously*. Nat Microbiol, 2016. **1**: p.  
786 16172.
- 787 11. Meeske, A.J., et al., *SEDS proteins are a widespread family of bacterial cell wall*  
788 *polymerases*. Nature, 2016. **537**(7622): p. 634-638.
- 789 12. Leclercq, S., et al., *Interplay between Penicillin-binding proteins and SEDS*  
790 *proteins promotes bacterial cell wall synthesis*. Scientific reports, 2017. **7**: p.  
791 43306-43306.
- 792 13. Reichmann, N.T., et al., *SEDS-bPBP pairs direct lateral and septal peptidoglycan*  
793 *synthesis in Staphylococcus aureus*. Nat Microbiol, 2019. **4**(8): p. 1368-1377.
- 794 14. Sjodt, M., et al., *Structural coordination of polymerization and crosslinking by a*  
795 *SEDS-bPBP peptidoglycan synthase complex*. Nat Microbiol, 2020. **5**(6): p. 813-  
796 820.
- 797 15. Straume, D., et al., *Class A PBPs have a distinct and unique role in the*  
798 *construction of the pneumococcal cell wall*. Proc Natl Acad Sci U S A, 2020.  
799 **117**(11): p. 6129-6138.
- 800 16. Vigouroux, A., et al., *Class-A penicillin binding proteins do not contribute to cell*  
801 *shape but repair cell-wall defects*. Elife, 2020. **9**.
- 802 17. Cameron, T.A., et al., *Peptidoglycan synthesis machinery in Agrobacterium*  
803 *tumefaciens during unipolar growth and cell division*. mBio, 2014. **5**(3): p.  
804 e01219-14.
- 805 18. Gupta, R., et al., *The Mycobacterium tuberculosis protein LdtMt2 is a*  
806 *nonclassical transpeptidase required for virulence and resistance to amoxicillin*.  
807 Nat Med, 2010. **16**(4): p. 466-9.
- 808 19. Glauner, B., J.V. Holtje, and U. Schwarz, *The composition of the murein of*  
809 *Escherichia coli*. J Biol Chem, 1988. **263**(21): p. 10088-95.
- 810 20. Cordillot, M., et al., *In vitro cross-linking of Mycobacterium tuberculosis*  
811 *peptidoglycan by L,D-transpeptidases and inactivation of these enzymes by*  
812 *carbapenems*. Antimicrob Agents Chemother, 2013. **57**(12): p. 5940-5.
- 813 21. Kysela, D.T., et al., *Biological consequences and advantages of asymmetric*  
814 *bacterial growth*. Annu Rev Microbiol, 2013. **67**: p. 417-35.
- 815 22. Aldridge, B.B., et al., *Asymmetry and aging of mycobacterial cells lead to variable*  
816 *growth and antibiotic susceptibility*. Science, 2012. **335**(6064): p. 100-4.
- 817 23. Piovesan, D., et al., *MobiDB 3.0: more annotations for intrinsic disorder,*  
818 *conformational diversity and interactions in proteins*. Nucleic Acids Res, 2018.  
819 **46**(D1): p. D471-D476.



- 820 24. Ducret, A., E.M. Quardokus, and Y.V. Brun, *MicrobeJ, a tool for high throughput*  
821 *bacterial cell detection and quantitative analysis*. Nat Microbiol, 2016. **1**(7): p.  
822 16077.
- 823 25. McGill, R., J.W. Tukey, and W.A. Larsen, *Variations of Box Plots*. The American  
824 Statistician, 1978. **32**(1): p. 12-16.
- 825 26. Curtis, P.D. and Y.V. Brun, *Identification of essential alphaproteobacterial genes*  
826 *reveals operational variability in conserved developmental and cell cycle*  
827 *systems*. Mol Microbiol, 2014. **93**(4): p. 713-35.
- 828 27. Figueroa-Cuilan, W., et al., *Mini-Tn7 Insertion in an Artificial attTn7 Site Enables*  
829 *Depletion of the Essential Master Regulator CtrA in the Phytopathogen*  
830 *Agrobacterium tumefaciens*. Appl Environ Microbiol, 2016. **82**(16): p. 5015-25.
- 831 28. Derouaux, A., et al., *The monofunctional glycosyltransferase of Escherichia coli*  
832 *localizes to the cell division site and interacts with penicillin-binding protein 3,*  
833 *FtsW, and FtsN*. J Bacteriol, 2008. **190**(5): p. 1831-4.
- 834 29. Di Berardino, M., et al., *The monofunctional glycosyltransferase of Escherichia*  
835 *coli is a member of a new class of peptidoglycan-synthesising enzymes*. FEBS  
836 Lett, 1996. **392**(2): p. 184-8.
- 837 30. Cserti, E., et al., *Dynamics of the peptidoglycan biosynthetic machinery in the*  
838 *stalked budding bacterium Hyphomonas neptunium*. Mol Microbiol, 2017. **103**(5):  
839 p. 875-895.
- 840 31. Miyakawa, T., et al., *Cell wall peptidoglycan mutants of Escherichia coli K-12:*  
841 *existence of two clusters of genes, mra and mrb, for cell wall peptidoglycan*  
842 *biosynthesis*. J Bacteriol, 1972. **112**(2): p. 950-8.
- 843 32. Howell, M., et al., *Agrobacterium tumefaciens divisome proteins regulate the*  
844 *transition from polar growth to cell division*. Mol Microbiol, 2019. **111**(4): p. 1074-  
845 1092.
- 846 33. Fujiwara, T. and S. Fukui, *Unidirectional growth and branch formation of a*  
847 *morphological mutant, Agrobacterium tumefaciens*. J Bacteriol, 1974. **120**(2): p.  
848 583-9.
- 849 34. Taguchi, A., et al., *FtsW is a peptidoglycan polymerase that is functional only in*  
850 *complex with its cognate penicillin-binding protein*. Nature microbiology, 2019.  
851 **4**(4): p. 587-594.
- 852 35. Radkov, A.D., et al., *Imaging Bacterial Cell Wall Biosynthesis*. Annu Rev  
853 Biochem, 2018. **87**: p. 991-1014.
- 854 36. Liechti, G.W., et al., *A new metabolic cell-wall labelling method reveals*  
855 *peptidoglycan in Chlamydia trachomatis*. Nature, 2014. **506**(7489): p. 507-510.
- 856 37. Garcia-Heredia, A., et al., *Peptidoglycan precursor synthesis along the sidewall*  
857 *of pole-growing mycobacteria*. Elife, 2018. **7**.
- 858 38. Kuru, E., *NOVEL WAYS FOR DECORATING BACTERIAL CELL WALLS*  
859 *ADVANCE FUNDAMENTAL KNOWLEDGE ABOUT BACTERIAL GROWTH*.  
860 2016, Indiana University: ProQuest LLC.
- 861 39. Hsu, Y.P., et al., *Full color palette of fluorescent d-amino acids for in situ labeling*  
862 *of bacterial cell walls*. Chem Sci, 2017. **8**(9): p. 6313-6321.
- 863 40. Kuru, E., et al., *Synthesis of fluorescent D-amino acids and their use for probing*  
864 *peptidoglycan synthesis and bacterial growth in situ*. Nat Protoc, 2015. **10**(1): p.  
865 33-52.

- 866 41. Kuru, E., et al., *In Situ probing of newly synthesized peptidoglycan in live bacteria*  
867 *with fluorescent D-amino acids*. *Angew Chem Int Ed Engl*, 2012. **51**(50): p.  
868 12519-23.
- 869 42. Montón Silva, A., et al., *The Fluorescent D-Amino Acid NADA as a Tool to Study*  
870 *the Conditional Activity of Transpeptidases in Escherichia coli*. 2018. **9**(2101).
- 871 43. Hugonnet, J.E., et al., *Factors essential for L,D-transpeptidase-mediated*  
872 *peptidoglycan cross-linking and beta-lactam resistance in Escherichia coli*. *Elife*,  
873 2016. **5**.
- 874 44. Tooke, C.L., et al., *beta-Lactamases and beta-Lactamase Inhibitors in the 21st*  
875 *Century*. *J Mol Biol*, 2019. **431**(18): p. 3472-3500.
- 876 45. Kumar, P., et al., *Mycobacterium abscessus L,d-Transpeptidases Are Susceptible*  
877 *to Inactivation by Carbapenems and Cephalosporins but Not Penicillins*.  
878 *Antimicrob Agents Chemother*, 2017. **61**(10).
- 879 46. Kumar, P., et al., *Non-classical transpeptidases yield insight into new*  
880 *antibacterials*. *Nat Chem Biol*, 2017. **13**(1): p. 54-61.
- 881 47. Gampe, C.M., et al., *Modular synthesis of diphospholipid oligosaccharide*  
882 *fragments of the bacterial cell wall and their use to study the mechanism of*  
883 *moenomycin and other antibiotics*. *Tetrahedron*, 2011. **67**(51): p. 9771-9778.
- 884 48. Sternon, J.F., et al., *Transposon Sequencing of Brucella abortus Uncovers*  
885 *Essential Genes for Growth In Vitro and Inside Macrophages*. *Infect Immun*,  
886 2018. **86**(8).
- 887 49. Bandara, A.B., et al., *The putative penicillin-binding proteins 1 and 2 are*  
888 *important for viability, growth and cell morphology of Brucella melitensis*. *Vet*  
889 *Microbiol*, 2009. **133**(4): p. 387-93.
- 890 50. Pazos, M. and W. Vollmer, *Regulation and function of class A Penicillin-binding*  
891 *proteins*. *Curr Opin Microbiol*, 2021. **60**: p. 80-87.
- 892 51. Strobel, W., et al., *Function and localization dynamics of bifunctional penicillin-*  
893 *binding proteins in Caulobacter crescentus*. *J Bacteriol*, 2014. **196**(8): p. 1627-39.
- 894 52. McPherson, D.C. and D.L. Popham, *Peptidoglycan synthesis in the absence of*  
895 *class A penicillin-binding proteins in Bacillus subtilis*. *J Bacteriol*, 2003. **185**(4): p.  
896 1423-31.
- 897 53. Rohs, P.D.A., et al., *A central role for PBP2 in the activation of peptidoglycan*  
898 *polymerization by the bacterial cell elongation machinery*. *PLoS Genet*, 2018.  
899 **14**(10): p. e1007726.
- 900 54. Banzhaf, M., et al., *Cooperativity of peptidoglycan synthases active in bacterial*  
901 *cell elongation*. *Mol Microbiol*, 2012. **85**(1): p. 179-94.
- 902 55. Dion, M.F., et al., *Bacillus subtilis cell diameter is determined by the opposing*  
903 *actions of two distinct cell wall synthetic systems*. *Nat Microbiol*, 2019. **4**(8): p.  
904 1294-1305.
- 905 56. Mueller, E.A., et al., *Plasticity of Escherichia coli cell wall metabolism promotes*  
906 *fitness and antibiotic resistance across environmental conditions*. *Elife*, 2019. **8**.
- 907 57. Venturi, V. and C. Keel, *Signaling in the Rhizosphere*. *Trends Plant Sci*, 2016.  
908 **21**(3): p. 187-198.
- 909 58. Shi, H., et al., *How to Build a Bacterial Cell: MreB as the Foreman of E. coli*  
910 *Construction*. *Cell*, 2018. **172**(6): p. 1294-1305.

- 911 59. Zupan, J.R., et al., *GROWTH POLE RING protein forms a 200-nm-diameter ring*  
912 *structure essential for polar growth and rod shape in Agrobacterium tumefaciens.*  
913 Proc Natl Acad Sci U S A, 2019. **116**(22): p. 10962-10967.
- 914 60. Schaper, S., et al., *Seven-transmembrane receptor protein RgsP and cell wall-*  
915 *binding protein RgsM promote unipolar growth in Rhizobiales.* PLoS Genet,  
916 2018. **14**(8): p. e1007594.
- 917 61. Kuru, E., et al., *Author Correction: Fluorescent D-amino-acids reveal bi-cellular*  
918 *cell wall modifications important for Bdellovibrio bacteriovorus predation.* Nat  
919 Microbiol, 2018. **3**(2): p. 254.
- 920 62. Baranowski, C., et al., *Maturing Mycobacterium smegmatis peptidoglycan*  
921 *requires non-canonical crosslinks to maintain shape.* Elife, 2018. **7**.
- 922 63. Schoonmaker, M.K., W.R. Bishai, and G. Lamichhane, *Nonclassical*  
923 *transpeptidases of Mycobacterium tuberculosis alter cell size, morphology, the*  
924 *cytosolic matrix, protein localization, virulence, and resistance to beta-lactams.* J  
925 Bacteriol, 2014. **196**(7): p. 1394-402.
- 926 64. Kieser, K.J., et al., *Phosphorylation of the Peptidoglycan Synthase PonA1*  
927 *Governs the Rate of Polar Elongation in Mycobacteria.* PLoS Pathog, 2015.  
928 **11**(6): p. e1005010.
- 929 65. Valbuena, N., et al., *Characterization of HMW-PBPs from the rod-shaped*  
930 *actinomycete Corynebacterium glutamicum: peptidoglycan synthesis in cells*  
931 *lacking actin-like cytoskeletal structures.* Mol Microbiol, 2007. **66**(3): p. 643-57.
- 932 66. Joyce, G., et al., *Cell division site placement and asymmetric growth in*  
933 *mycobacteria.* PLoS One, 2012. **7**(9): p. e44582.
- 934 67. Lavollay, M., et al., *The peptidoglycan of stationary-phase Mycobacterium*  
935 *tuberculosis predominantly contains cross-links generated by L,D-*  
936 *transpeptidation.* J Bacteriol, 2008. **190**(12): p. 4360-6.
- 937 68. Lavollay, M., et al., *The Peptidoglycan of Mycobacterium abscessus Is*  
938 *Predominantly Cross-Linked by L,D-Transpeptidases.* J Bacteriol, 2011. **193**(3):  
939 p. 778-782.
- 940 69. Morton, E.R. and C. Fuqua, *Laboratory maintenance of Agrobacterium.* Curr  
941 Protoc Microbiol, 2012. **Chapter 1**: p. Unit3D 1.
- 942 70. Morton, E.R. and C. Fuqua, *Unit 3D.2 Genetic Manipulation of Agrobacterium.*  
943 Curr Protoc Microbiol, 2012. **Chapter**: p. Unit-3D.2.
- 944 71. Schafer, A., et al., *Small mobilizable multi-purpose cloning vectors derived from*  
945 *the Escherichia coli plasmids pK18 and pK19: selection of defined deletions in*  
946 *the chromosome of Corynebacterium glutamicum.* Gene, 1994. **145**(1): p. 69-73.
- 947 72. Howell, M., J.J. Daniel, and P.J.B. Brown, *Live Cell Fluorescence Microscopy to*  
948 *Observe Essential Processes During Microbial Cell Growth.* JoVE, 2017(129): p.  
949 e56497.

950
